# Supplementary material for: Low oxygen alters mitochondrial function and response to oxidative stress in human neural progenitor cells
Source: PeerJ journal article supplement (doi:10.7717/peerj.1486), 2015-12-10

act.Casp3/7<sup>+</sup>

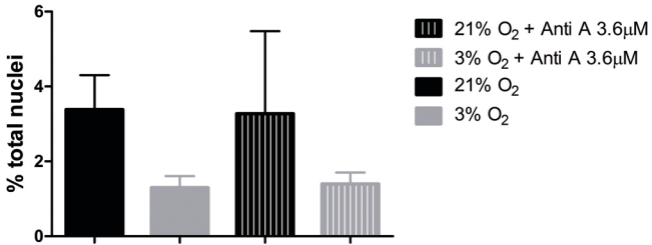

Supplement: Supplemental_Information_1.pdf [file Supplemental_Information_1.pdf]
