# Supplementary material for: Low oxygen alters mitochondrial function and response to oxidative stress in human neural progenitor cells
Source: PeerJ journal article supplement (doi:10.7717/peerj.1486), 2015-12-10

A

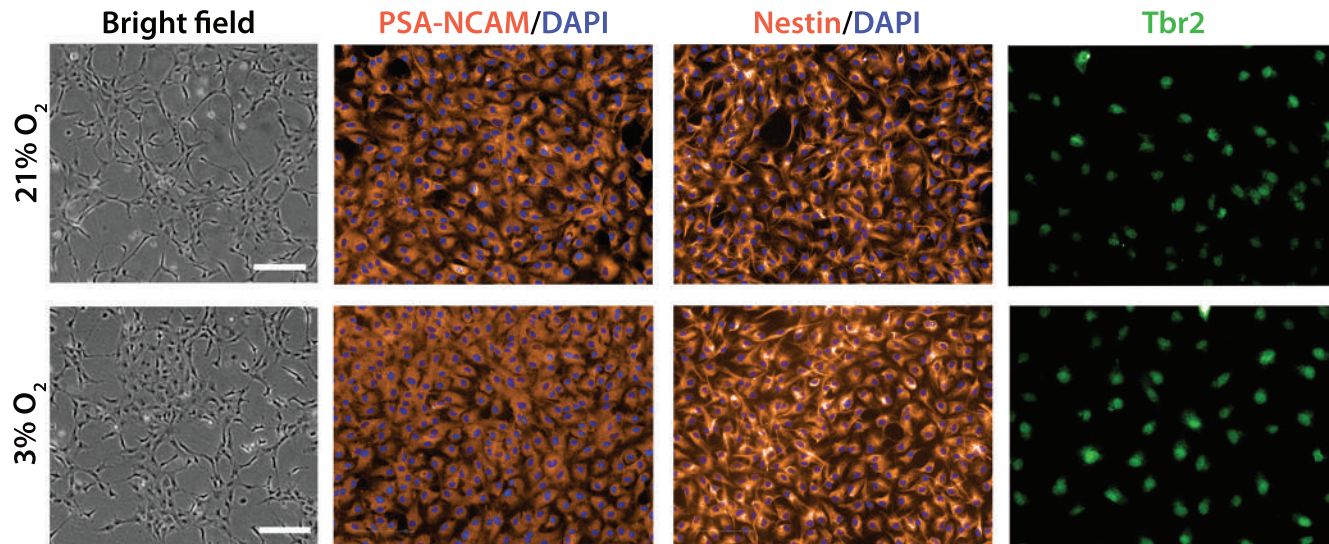

B

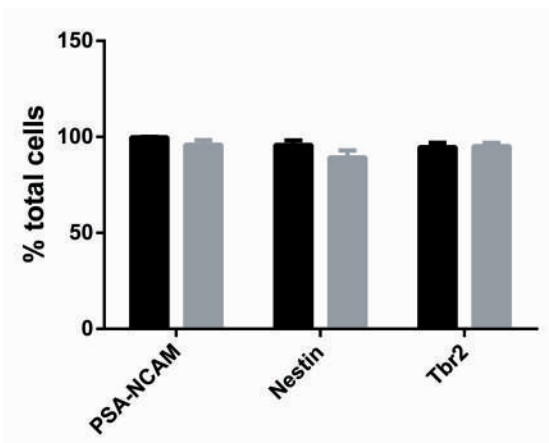

C

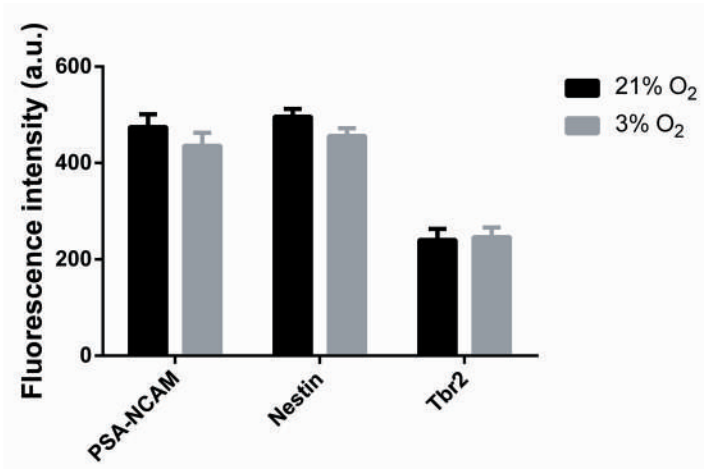

Supplement: Supplemental_Information_2_.pdf [file Supplemental_Information_2_.pdf]
